# Supplementary material for: De novo and inherited variants in coding and regulatory regions in genetic cardiomyopathies
Source: PubMed Central journal article supplement (PMC9647983; doi:10.1186/s40246-022-00420-0), 2022-11-10
Supplement: 40246_2022_420_MOESM1_ESM.pdf [file 40246_2022_420_MOESM1_ESM.pdf]

**Table S1: Prioritised noncoding DNVs within the human ventricular cardiomyocyte regulome. We used the ABC model to predict enhancer–gene connections in cardiomyocytes. Promoters were defined as 2 kb upstream or 1 kb downstream of TSSs. Promoter Capture Hi-C (pcHi-C) interactions were obtained from the 3DIV database. The Fathmm-MKL score indicates the pathogenic impact of individual SNVs. Predictions are given as p-values in the range 0 to 1; values > 0.5 are predicted to be deleterious.**

| Family ID | Disease | Genomic position (GRCh38) | ABC predictions                          | -2kb/1kb of TSS     | 3DIV pcHi-C                                                                                                                                              | Fathmm-MKL score |
|-----------|---------|---------------------------|------------------------------------------|---------------------|----------------------------------------------------------------------------------------------------------------------------------------------------------|------------------|
| Fam000    | HCM     | chr8:140511298 A>C        | AGO2; TRAPPC9                            | CHRAC1              | .                                                                                                                                                        | 0.60893          |
| Fam087    | DCM     | chr2:227503696 G>C        | AGFG1                                    | .                   | .                                                                                                                                                        | 0.68879          |
| Fam108    | DCM     | chr19:44008139 A>T        |                                          | PHLDB3              | .                                                                                                                                                        | 0.74361          |
| Fam126    | DCM     | chr6:144216524 C>CA       | <b>UTRN</b> ; STX11; SF3B5               | .                   | .                                                                                                                                                        | NA               |
| Fam306    | LVNC    | chr6:150196298 G>A        | PPP1R14C                                 | .                   | .                                                                                                                                                        | 0.84031          |
| Fam313    | DCM     | chr6:26189301 G>GTA       | .                                        | H4C4                | <b>H1-2</b> ; H1-4; H1-6; H2AC11; H2AC12;<br>H2AC4; H2AC8; H2BC10; H2BC11;<br>H2BC12; H2BC5; H2BC9; H3C2;<br>H3C6; H3C7; H3C8; H4C3; H4C7;<br>H4C8; H4C9 | NA               |
| Fam334    | DCM     | chr17:75784788 T>C        | UNC13D; WBP2; <b>SAP30BP</b> ;<br>TRIM65 | H3-3B; MIR4738; UNK | TRIM56; TMEM94                                                                                                                                           | 0.84602          |
| Fam338    | LVNC    | chr15:40953466 C>T        | .                                        | CHAC1               | DLL4                                                                                                                                                     | 0.61755          |
| Fam468    | HCM     | chr1:116485382 A>T        | ATP1A1                                   | .                   | .                                                                                                                                                        | 0.8964           |
| Fam499    | HCM     | chr20:44116250 A>G        | <b>JPH2</b>                              | .                   | .                                                                                                                                                        | 0.88391          |
| Fam499    | HCM     | chr5:140711461 A>G        | .                                        | VTRNA1-1            | .                                                                                                                                                        | 0.99137          |
| Fam509    | HCM     | chr19:18557700 C>T        | ELL                                      | KXD1                | .                                                                                                                                                        | 0.9407           |
| Fam539    | HCM     | chr10:68406789 C>T        | .                                        | RUFY2               | .                                                                                                                                                        | 0.73967          |
| Fam571    | DCM     | chr2:189661420 AAAAG>A    | .                                        | ASNSD1; ASDURF      | WDR17                                                                                                                                                    | NA               |
| Fam599    | HCM     | chr20:298489 C>G          | SOX12                                    | ZCCHC3              | SOX12                                                                                                                                                    | 0.94203          |
| Fam687    | LVNC    | chr4:18021878 A>G         | DCAF16                                   | LCORL               | LAP3                                                                                                                                                     | 0.93949          |
| Fam733    | HCM     | chr9:131270697 A>G        | .                                        | FAM78A              | .                                                                                                                                                        | 0.8224           |
| Fam737    | HCM     | chr2:96816570 G>C         | .                                        | CNNM3               | .                                                                                                                                                        | 0.52844          |
| Fam791    | ARVC    | chr11:67317729 C>T        | GRK2; <b>RHOD</b>                        | RAD9A               | .                                                                                                                                                        | 0.76606          |
| Fam992    | ARVC    | chr8:15540211 C>A         | TUSC3                                    | .                   | .                                                                                                                                                        | 0.8979           |
