# Supplementary material for: De novo and inherited variants in coding and regulatory regions in genetic cardiomyopathies
Source: PubMed Central journal article supplement (PMC9647983; doi:10.1186/s40246-022-00420-0), 2022-11-10
Supplement: 40246_2022_420_MOESM2_ESM.pdf [file 40246_2022_420_MOESM2_ESM.pdf]

**Table S2: All gene targets of noncoding DNVs directly or indirectly associated with cardiomyopathy. The score is an indication of the strength of the connection between the gene and the disease. The average disease-causing likelihood column reflects the principle that a variant in a gene with high mutation intolerance is more likely to be disease causing.**

| Gene     | Description                                                         | Relationship | Score | Average disease-causing likelihood |
|----------|---------------------------------------------------------------------|--------------|-------|------------------------------------|
| JPH2     | Junctophilin 2                                                      | Direct       | 36.89 | 39.33%                             |
| UTRN     | Utrophin                                                            | Direct       | 5.32  | 55.78%                             |
| H1-2     | H1.2 Linker Histone, Cluster Member                                 | Indirect     | 5.04  | 20.85%                             |
| RHOD     | Ras Homolog Family Member D                                         | Direct       | 3.48  | 45.89%                             |
| SAP30BP  | SAP30 Binding Protein                                               | Indirect     | 3.48  | 0.00%                              |
| H3C6     | H3 Clustered Histone 6                                              | Indirect     | 3.32  | 81.77%                             |
| H3-3B    | H3.3 Histone B                                                      | Indirect     | 3.25  | 34.95%                             |
| WBP2     | WW Domain Binding Protein 2                                         | Indirect     | 3.06  | 68.19%                             |
| H3C2     | H3 Clustered Histone 2                                              | Indirect     | 3.03  | 88.22%                             |
| H3C7     | H3 Clustered Histone 7                                              | Indirect     | 3.03  | 81.24%                             |
| H3C8     | H3 Clustered Histone 8                                              | Indirect     | 3.03  | 85.98%                             |
| TRIM65   | Tripartite Motif Containing 65                                      | Indirect     | 2.75  | 0.00%                              |
| RUFY2    | RUN And FYVE Domain Containing 2                                    | Indirect     | 2.62  | 69.67%                             |
| H2AC11   | H2A Clustered Histone 11                                            | Indirect     | 2.59  | 82.88%                             |
| H2AC12   | H2A Clustered Histone 12                                            | Indirect     | 2.59  | 54.14%                             |
| H1-6     | H1.6 Linker Histone, Cluster Member                                 | Indirect     | 2.5   | 15.11%                             |
| DLL4     | Delta Like Canonical Notch Ligand 4                                 | Indirect     | 2.39  | 82.27%                             |
| SOX12    | SRY-Box Transcription Factor 12                                     | Indirect     | 2.11  | 0.00%                              |
| VTRNA1-1 | Vault RNA 1-1                                                       | Indirect     | 1.91  | 0.00%                              |
| ELL      | Elongation Factor For RNA Polymerase II                             | Indirect     | 1.85  | 60.67%                             |
| H2AC4    | H2A Clustered Histone 4                                             | Indirect     | 1.57  | 74.78%                             |
| CNNM3    | Cyclin And CBS Domain Divalent Metal Cation Transport Mediator 3    | Indirect     | 1.55  | 65.45%                             |
| MIR4738  | MicroRNA 4738                                                       | Indirect     | 1.55  | 0.00%                              |
| H2BC9    | H2B Clustered Histone 9                                             | Indirect     | 1.51  | 83.92%                             |
| H2BC11   | H2B Clustered Histone 11                                            | Indirect     | 1.49  | 76.73%                             |
| H2BC12   | H2B Clustered Histone 12                                            | Indirect     | 1.49  | 69.36%                             |
| H2BC5    | H2B Clustered Histone 5                                             | Indirect     | 1.49  | 68.98%                             |
| UNK      | Unk Zinc Finger                                                     | Indirect     | 1.46  | 60.17%                             |
| H4C7     | H4 Clustered Histone 7                                              | Indirect     | 1.45  | 46.88%                             |
| H2BC10   | H2B Clustered Histone 10                                            | Indirect     | 1.44  | 76.56%                             |
| CHAC1    | ChaC Glutathione Specific Gamma-Glutamylcyclotransferase 1          | Indirect     | 1.39  | 34.03%                             |
| GRK2     | G Protein-Coupled Receptor Kinase 2                                 | Direct       | 1.35  | 87.88%                             |
| ATP1A1   | ATPase Na <sup>+</sup> /K <sup>+</sup> Transporting Subunit Alpha 1 | Direct       | 1.17  | 85.82%                             |
| FAM78A   | Family With Sequence Similarity 78 Member A                         | Indirect     | 1.11  | 75.79%                             |
| PPP1R14C | Protein Phosphatase 1 Regulatory Inhibitor Subunit 14C              | Indirect     | 1.05  | 62.46%                             |
| H4C3     | H4 Clustered Histone 3                                              | Direct       | 0.94  | 85.81%                             |
| H4C4     | H4 Clustered Histone 4                                              | Direct       | 0.94  | 76.99%                             |
| H4C8     | H4 Clustered Histone 8                                              | Direct       | 0.94  | 89.08%                             |
| H4C9     | H4 Clustered Histone 9                                              | Direct       | 0.94  | 79.34%                             |
| TUSC3    | Tumor Suppressor Candidate 3                                        | Indirect     | 0.94  | 86.57%                             |
| SF3B5    | Splicing Factor 3b Subunit 5                                        | Indirect     | 0.71  | 74.53%                             |
| WDR17    | WD Repeat Domain 17                                                 | Indirect     | 0.69  | 24.37%                             |
| CHRAC1   | Chromatin Accessibility Complex Subunit 1                           | Indirect     | 0.6   | 42.77%                             |
| PHLDB3   | Pleckstrin Homology Like Domain Family B Member 3                   | Indirect     | 0.58  | 15.67%                             |
| TRAPPC9  | Trafficking Protein Particle Complex Subunit 9                      | Direct       | 0.54  | 52.47%                             |
| ASNSD1   | Asparagine Synthetase Domain Containing 1                           | Indirect     | 0.43  | 69.93%                             |
| ZCCHC3   | Zinc Finger CCHC-Type Containing 3                                  | Indirect     | 0.43  | 82.46%                             |
| H1-4     | H1.4 Linker Histone, Cluster Member                                 | Direct       | 0.35  | 70.55%                             |
| AGO2     | Argonaute RISC Catalytic Component 2                                | Direct       | 0.34  | 97.12%                             |
| LAP3     | Leucine Aminopeptidase 3                                            | Direct       | 0.34  | 57.83%                             |
| DCAF16   | DDB1 And CUL4 Associated Factor 16                                  | Indirect     | 0.32  | 46.35%                             |
| TMEM94   | Transmembrane Protein 94                                            | Indirect     | 0.31  | 77.65%                             |
| LCORL    | Ligand Dependent Nuclear Receptor Corepressor Like                  | Indirect     | 0.3   | 0.00%                              |
| AGFG1    | ArfGAP With FG Repeats 1                                            | Direct       | 0.25  | 74.75%                             |
| H2AC8    | H2A Clustered Histone 8                                             | Direct       | 0.25  | 86.55%                             |
| KXD1     | KxDL Motif Containing 1                                             | Direct       | 0.25  | 23.74%                             |
| RAD9A    | RAD9 Checkpoint Clamp Component A                                   | Direct       | 0.25  | 42.70%                             |
| STX11    | Syntaxin 11                                                         | Direct       | 0.25  | 38.66%                             |
| TRIM56   | Tripartite Motif Containing 56                                      | Direct       | 0.25  | 70.65%                             |
| UNC13D   | Unc-13 Homolog D                                                    | Direct       | 0.25  | 29.74%                             |
| ASDURF   | ASNSD1 Upstream Open Reading Frame                                  | Indirect     | 0.07  | 0.00%                              |
