# Supplementary material for: De novo and inherited variants in coding and regulatory regions in genetic cardiomyopathies
Source: PubMed Central journal article supplement (PMC9647983; doi:10.1186/s40246-022-00420-0), 2022-11-10
Supplement: 40246_2022_420_MOESM3_ESM.pdf [file 40246_2022_420_MOESM3_ESM.pdf]

Table S1: Activity-by-Contact (ABC) model predictions of known cardiomyopathy genes in ventricular cardiomyocytes

| Chr   | Start     | End       | Class      | Activity base | Target gene | Target gene TSS | Target gene promoter activity quantile | Distance | Is self promoter | Powerlaw contact | Powerlaw contact reference | HiC contact | HiC contact pl scaled | HiC pseudocount | HiC contact pl scaled adj | ABC score numerator | ABC score | Powerlaw score numerator | Powerlaw score | Cell type       | ABC score rank |
|-------|-----------|-----------|------------|---------------|-------------|-----------------|----------------------------------------|----------|------------------|------------------|----------------------------|-------------|-----------------------|-----------------|---------------------------|---------------------|-----------|--------------------------|----------------|-----------------|----------------|
| chr1  | 156106010 | 156106611 | intergenic | 13.310302     | LMNA        | 156114669       | 0.673354                               | 8359     | FALSE            | 0.078941         | 0.078941                   | 0.060126    | 0.060126              | 0.001229        | 0.061355                  | 0.816651            | 0.106916  | 1.050727                 | 0.071948       | Ventricular_CMs | 1              |
| chr1  | 201377601 | 201378015 | promoter   | 19.775764     | TNNT2       | 201377700       | 0.930789                               | 107.5    | TRUE             | 0.123436         | 0.123436                   | 0.03435     | 0.03435               | 0.001229        | 0.03558                   | 0.703614            | 0.123237  | 2.441042                 | 0.179914       | Ventricular_CMs | 1              |
| chr10 | 110636986 | 110637185 | intergenic | 16.900542     | RBM20       | 110644396       | 0.764828                               | 7311     | FALSE            | 0.088697         | 0.088697                   | 0.022325    | 0.022325              | 0.001229        | 0.023554                  | 0.398079            | 0.092421  | 1.499031                 | 0.124352       | Ventricular_CMs | 1              |
| chr10 | 119651114 | 119651512 | promoter   | 18.774625     | BAG3        | 119651369       | 0.924556                               | 56.5     | TRUE             | 0.123436         | 0.123436                   | 0.039034    | 0.039034              | 0.001229        | 0.040264                  | 0.755935            | 0.197683  | 2.317466                 | 0.287607       | Ventricular_CMs | 1              |
| chr11 | 47351831  | 47352030  | genic      | 17.724121     | MYBPC3      | 47352702        | 0.887649                               | 772      | FALSE            | 0.123436         | 0.123436                   | 0.046617    | 0.046617              | 0.001229        | 0.047847                  | 0.84804             | 0.149349  | 2.187796                 | 0.186447       | Ventricular_CMs | 1              |
| chr14 | 23438169  | 23438368  | intergenic | 33.205948     | MYH7        | 23435686        | 0.920197                               | 2582     | FALSE            | 0.123436         | 0.123436                   | 0.027188    | 0.027188              | 0.001229        | 0.028417                  | 0.943608            | 0.117895  | 4.098811                 | 0.202785       | Ventricular_CMs | 1              |
| chr2  | 178807324 | 178807586 | promoter   | 12.275114     | TTN         | 178807423       | 0.858604                               | 31.5     | TRUE             | 0.123436         | 0.123436                   | 0.02878     | 0.02878               | 0.001229        | 0.03001                   | 0.368372            | 0.14719   | 1.515192                 | 0.215205       | Ventricular_CMs | 1              |
| chr2  | 219419848 | 219420047 | genic      | 8.815552      | DES         | 219418376       | 0.799169                               | 1571     | FALSE            | 0.123436         | 0.123436                   | 0.044384    | 0.044384              | 0.001229        | 0.045613                  | 0.402106            | 0.057051  | 1.088157                 | 0.071798       | Ventricular_CMs | 1              |
| chr3  | 38645770  | 38645969  | genic      | 7.954766      | SCN5A       | 38649672        | 0.747495                               | 3803     | FALSE            | 0.123436         | 0.123436                   | 0.038343    | 0.038343              | 0.001229        | 0.039572                  | 0.314787            | 0.074426  | 0.981905                 | 0.119207       | Ventricular_CMs | 1              |
| chr3  | 52452672  | 52453127  | genic      | 33.339543     | TNNC1       | 52454041        | 0.804485                               | 1142     | FALSE            | 0.123436         | 0.123436                   | 0.047516    | 0.047516              | 0.001229        | 0.048745                  | 1.625129            | 0.219908  | 4.115302                 | 0.284333       | Ventricular_CMs | 1              |
| chr6  | 7541333   | 7542604   | promoter   | 15.27033      | DSP         | 7541574         | 0.812979                               | 394      | TRUE             | 0.123436         | 0.123436                   | 0.032826    | 0.032826              | 0.001229        | 0.034055                  | 0.520034            | 0.187122  | 1.884909                 | 0.32017        | Ventricular_CMs | 1              |
| chr6  | 118537644 | 118537843 | genic      | 7.678519      | PLN         | 118548262       | 0.551552                               | 10519    | FALSE            | 0.064635         | 0.064635                   | 0.010951    | 0.010951              | 0.001229        | 0.012181                  | 0.093529            | 0.061553  | 0.496301                 | 0.120409       | Ventricular_CMs | 1              |
| chr7  | 128831493 | 128831692 | genic      | 15.099412     | FLNC        | 128830428       | 0.772446                               | 1164     | FALSE            | 0.123436         | 0.123436                   | 0.049597    | 0.049597              | 0.001229        | 0.050826                  | 0.767444            | 0.143531  | 1.863812                 | 0.156495       | Ventricular_CMs | 1              |
